1

## Research

2 **Dynamic virulence-related regions of the fungal plant pathogen *Verticillium***  
3 ***dahliae* display remarkably enhanced sequence conservation**

4

5 Jasper R.L. Depotter<sup>1,2</sup>, Xiaoqian Shi-Kunne<sup>1</sup>, H  l  ne Missonnier<sup>3, 4</sup>, Tingli Liu<sup>5</sup>, Luigi  
6 Faino<sup>1</sup>, Grady C.M. van den Berg<sup>1</sup>, Thomas A. Wood<sup>2</sup>, Baolong Zhang<sup>5</sup>, Alban Jacques<sup>3</sup>,  
7 Michael F. Seidl<sup>1</sup>, Bart P.H.J. Thomma<sup>1\*</sup>

8

9 <sup>1</sup>Laboratory of Phytopathology, Wageningen University, Droevendaalsesteeg 1, 6708 PB  
10 Wageningen, The Netherlands

11 <sup>2</sup>Department of Crops and Agronomy, National Institute of Agricultural Botany, Huntingdon  
12 Road, CB3 0LE Cambridge, United Kingdom

13 <sup>3</sup>Physiologie Pathologie et G  n  tique V  g  tales (PPGV), Institut National Polytechnique de  
14 Toulouse, Ecole d'Ing  nieur de PURPAN, Universit   de Toulouse, Toulouse, France

15 <sup>4</sup>Syngenta France S.A.S., Saint-Sauveur, France

16 <sup>5</sup>Provincial Key Laboratory of Agrobiolgy, Jiangsu Academy of Agricultural Sciences,  
17 Nanjing 210014, China

18

19 J.R.L.D. and X.S. contributed equally to this work, H.M. and T.L. contributed equally to this  
20 work, B.Z. and A.J. contributed equally to this work, M.F.S. and B.P.H.J.T. contributed  
21 equally to this work

22

23 \*For correspondence: Bart P.H.J. Thomma, Laboratory of Phytopathology, Wageningen

24 University, Droevendaalsesteeg 1, 6708 PB Wageningen, The Netherlands. Tel. 0031-317-

25 484536, e-mail: [bart.thomma@wur.nl](mailto:bart.thomma@wur.nl)

26 **Running title:** Remarkable conservation of lineage-specific regions

27

28 **Key words:** comparative genomics; effector; genome evolution; mutagenesis; two-speed

29 genome; Verticillium wilt

30

31 **ABSTRACT**

32 Selection pressure impacts genomes unevenly, as different genes adapt with differential speed  
33 to establish an organism's optimal fitness. Plant pathogens co-evolve with their hosts, which  
34 implies continuously adaptation to evade host immunity. Effectors are secreted proteins that  
35 mediate immunity evasion, but may also typically become recognized by host immune  
36 receptors. To facilitate effector repertoire alterations, in many pathogens, effector genes  
37 reside in dynamic genomic regions that are thought to display accelerated evolution, a  
38 phenomenon that is captured by the two-speed genome hypothesis. The genome of the  
39 vascular wilt pathogen *Verticillium dahliae* has been proposed to obey to a similar two-speed  
40 regime with dynamic, lineage-specific regions that are characterized by genomic  
41 rearrangements, increased transposable element activity and enrichment in *in planta*-induced  
42 effector genes. However, little is known of the origin of, and sequence diversification within,  
43 these lineage-specific regions. Based on comparative genomics among *Verticillium* spp. we  
44 now show differential sequence divergence between core and lineage-specific genomic  
45 regions of *V. dahliae*. Surprisingly, we observed that lineage-specific regions display  
46 markedly increased sequence conservation. Since single nucleotide diversity is reduced in  
47 these regions, host adaptation seems to be merely achieved through presence/absence  
48 polymorphisms. Increased sequence conservation of genomic regions important for  
49 pathogenicity is an unprecedented finding for filamentous plant pathogens and signifies the  
50 diversity of genomic dynamics in host-pathogen co-evolution.

51

## 52 INTRODUCTION

53 Numerous microbes engage in symbiotic relationships with plants, comprising beneficial,  
54 commensalistic and parasitic relationships where each partner evolves towards its optimal  
55 fitness. Consequently, parasitic interactions between plants and microbial pathogens evolve  
56 as arms races in which plants try to halt microbial ingress while pathogens strive for  
57 continued symbiosis (Jones and Dangl 2006; Thomma et al. 2011; Cook et al. 2015). In such  
58 arms races, plant pathogens evolve repertoires of effector proteins, many of which deregulate  
59 host immunity, to enable host colonization (de Jonge et al. 2011; Rovenich et al. 2014).  
60 Plants, in turn, evolve immune receptors that recognize various molecular patterns that betray  
61 microbial invasion; so-called invasion patterns that can also include effectors (Cook et al.  
62 2015). Consequently, pathogen effector repertoires are typically subject to selective forces  
63 that often result in rapid diversification.

64 Effector genes are often not randomly organized in genomes of filamentous plant  
65 pathogens (Dong et al. 2015). For instance, effector genes of the potato late blight pathogen  
66 *Phytophthora infestans* reside in repeat-rich regions that display increased structural  
67 polymorphisms and enhanced levels of positive selection (Haas et al. 2009; Raffaele et al.  
68 2010). Based on this and observations in other pathogenic species, it has been proposed that  
69 many pathogens have a bipartite genome architecture with essential household genes residing  
70 in the core genome and effector genes co-localizing in repeat-rich compartments; a  
71 phenomenon that has been coined a two-speed genome (Croll and McDonald 2012; Raffaele  
72 and Kamoun 2012; Seidl and Thomma 2017). Conceivably, such genome  
73 compartmentalization increases the evolutionary efficiency as basal functions of core genes  
74 are “shielded off” from increased evolutionary dynamics that rapidly diversify effector gene  
75 repertoires. Repeat-rich genome regions display signs of such accelerated evolution as they  
76 are often enriched for structural variations such as presence/absence polymorphisms

77 (Raffaele et al. 2010) or chromosomal rearrangements (de Jonge et al. 2013; Faino et al.  
78 2016). In addition, increased diversification is also displayed on sequence levels in the form  
79 of higher substitution rates (Cuomo et al. 2007; van de Wouw et al. 2010) with a higher  
80 fraction of non-synonymous substitutions in genes located in repeat-rich regions compared to  
81 core genes (Raffaele et al. 2010; Stukenbrock et al. 2010; Sperschneider et al. 2015).

82 *Verticillium* is a genus of Ascomycete fungi, containing notorious plant pathogens of  
83 numerous crops, including tomato, cotton, olive and oilseed rape (Inderbitzin and Subbarao  
84 2014). *Verticillium* spp. are soil-borne fungi that infect their hosts via the roots and then  
85 colonize xylem vessels, resulting in vascular occlusion by host depositions and by the  
86 physical presence of the pathogen itself (Fradin and Thomma 2006). Currently, ten  
87 *Verticillium* species are described (Inderbitzin et al. 2011a). All these *Verticillium* spp. are  
88 haploids, except for *V. longisporum* that is an interspecific hybrid that contains approximately  
89 twice the amount of genetic material of haploid *Verticillium* spp. (Inderbitzin et al. 2011b;  
90 Depotter et al. 2017). *V. dahliae* is the most notorious plant pathogen within the *Verticillium*  
91 genus, causing disease on hundreds of plant species (Inderbitzin and Subbarao 2014).  
92 Similarly, *V. albo-atrum*, *V. alfalfa*, *V. nonalfalfae* and *V. longisporum* are pathogenic, albeit  
93 with more confined host ranges (Inderbitzin et al. 2011a; Inderbitzin and Subbarao 2014).  
94 The remaining *Verticillium* spp., namely *V. isaacii*, *V. klebahnii*, *V. nubilum*, *V. tricorpus* and  
95 *V. zaregamsianum*, sporadically cause disease on plants and are considered opportunists with  
96 a mainly saprophytic life style rather than genuine plant pathogens (Ebihara et al. 2003;  
97 Inderbitzin et al. 2011a; Gurung et al. 2015).

98 *Verticillium* spp. are thought to have a predominant, if not exclusive, asexual  
99 reproduction as a sexual cycle has never been described for any of the species (Short et al.  
100 2014). However, mating types, meiosis-specific genes and genomic recombination between  
101 clonal lineages have been observed for *V. dahliae*, suggesting that sexual reproduction is

102 either cryptic or ancestral (Milgroom et al. 2014; Short et al. 2014). Nevertheless,  
103 mechanisms different from meiotic recombination contribute to the genomic diversity of *V.*  
104 *dahliae*, such as large-scale genomic rearrangements, horizontal gene transfer and  
105 transposable element (TE) activity (de Jonge et al. 2012; de Jonge et al. 2013; Seidl and  
106 Thomma 2014; Faino et al. 2016). Signs of these evolutionary mechanisms converge on  
107 particular genomic regions that are enriched in repeats and lineage-specific (LS) sequences  
108 (Klosterman et al. 2011; de Jonge et al. 2013; Faino et al. 2016). Intriguingly, also *in planta*-  
109 induced effector genes are enriched in these LS regions (de Jonge et al. 2013).

110 We previously reported that LS regions of *V. dahliae* are largely derived from  
111 segmental duplications (Faino et al. 2016). Gene duplications are important sources for  
112 functional diversification (Magadum et al. 2013), and thus here we aim to investigate whether  
113 and how the nucleotide sequences within the LS regions diverge. To this end, comparative  
114 genomics was performed across the *Verticillium* genus, to identify genomic regions showing  
115 accelerated and reduced rates of sequence diversification to further characterize the two-  
116 speed genome of *V. dahliae*.

117

## 118 RESULTS

### 119 LS sequences reside in four regions of the genome of *V. dahliae* strain JR2

120 Previously, we identified regions in the genome sequence of *V. dahliae* isolate JR2 that lack  
121 synteny to various other *V. dahliae* strains, including the completely sequenced genome of  
122 strain VdLs17, and thus these regions have been referred to as LS regions (Faino et al. 2015;  
123 Faino et al. 2016). In *V. dahliae* isolate JR2, the majority of these LS sequences cluster into  
124 four genomic regions; chromosomes 2 and 4 each contain one LS region, while two distinct  
125 LS regions reside on chromosome 5. To further characterize these LS regions, we here  
126 pursued high-quality genome assemblies of additional *V. dahliae* strains based on single-  
127 molecule real-time (SMRT) using the PacBio RSII system. Since *V. dahliae* strains JR2 and  
128 VdLs17 only recently diverged (de Jonge et al. 2013), we selected two *V. dahliae* strains that  
129 are more diverged (Supplemental\_Figure\_S1), namely strains CQ2 and 85S isolated from  
130 cotton in China and sunflower in France, respectively. We generated 430,378 (~110x  
131 coverage) and 500,428 (~130x coverage) filtered sub-reads for strains CQ2 and 85S,  
132 respectively, that were assembled into 17 and 40 contigs with a total size of 35.8 and 35.9  
133 Mb, respectively (Supplemental\_Table\_S1), which is similar to the telomere-to-telomere  
134 assemblies of strains JR2 (36.2 Mb) and VdLs17 (36.0 Mb) (Faino et al. 2015).  
135 Subsequently, the assemblies of strains VdLs17, CQ2 and 85S were individually aligned to  
136 JR2 assembly. In total, 2.0%, 7.1% and 6.6% of the JR2 genome was not covered by  
137 sequences from VdLs17, CQ2 and 85S respectively, and 1.4% of the JR2 genome sequence  
138 could not be identified in any of the three other *V. dahliae* strains. The vast majority (88%,  
139 82% and 91% for VdLs17, CQ2 and 85S, respectively) of these JR2 sequences without  
140 alignment is located in the previously identified four LS regions (Figure 1). Thus, despite the  
141 addition of more diverged *V. dahliae* strains, intraspecific presence/absence polymorphisms

142 converge on the four previously identified genomic regions that are thus significantly more  
143 dynamic than other parts of the genome.

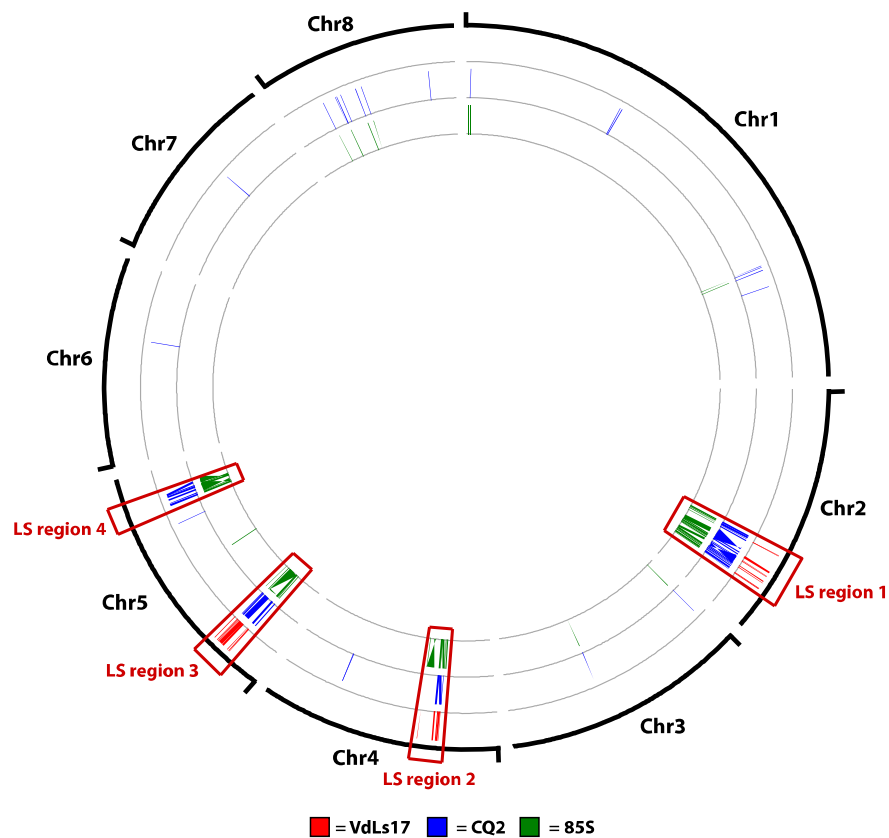

144

145 **Figure 1. Locations of lineage-specific (LS) regions in the genome of *V. dahliae* strain**

146 **JR2.** LS regions were determined by individual comparisons to *V. dahliae* strains VdLs17

147 (red), CQ2 (blue) and 85S (green). Sequences of minimum 7.5 kb without an alignment to at

148 least one of the other isolates are depicted at their respective position on the *V. dahliae* strain

149 JR2 genome.

150



151 **LS regions share increased sequence identity to other *Verticillium* spp.**

152 To study interspecific sequence conservation, we aligned sequences of the phylogenetically  
153 closely related and previously sequenced *V. nonalfalfae* strain TAB2 (Jelen et al. 2016; Shi-  
154 Kunne et al. in preparation) to the genome assembly of *V. dahliae* strain JR2. While most of  
155 the genome of *V. dahliae* JR2 aligns with *V. nonalfalfae* strain TAB2 with a genome-wide  
156 average sequence identity of ~92%, particular genomic regions display an increased sequence  
157 identity, even up to 100% (Supplemental\_Figure\_S2). Intriguingly, these regions co-localize  
158 with the LS regions of *V. dahliae* strain JR2, implying that these LS regions are either derived  
159 from a recent horizontal transfer, subject to negative selection that depletes sequence  
160 polymorphisms, or encounter lower mutation rates.

161 In order to evaluate whether LS sequences also display increased sequence  
162 conservation when compared with other *Verticillium* spp., we aligned sequences of all other  
163 haploid *Verticillium* spp. to the *V. dahliae* JR2 genome assembly. These genomic data were  
164 previously generated (Jelen et al. 2016; Shi-Kunne et al. in preparation), apart from the data  
165 for *V. isaacii* strain PD660 that we sequenced using the Illumina HiSeq2000 platform  
166 (Supplemental\_Table\_S2). Genomic sequences of *V. dahliae* (windows of 500 bp) were  
167 aligned to the other *Verticillium* spp., displaying median identities ranging from 88 to 95%  
168 (Table 1). These percentages correspond to the phylogenetic distance of the respective  
169 species to *V. dahliae*. Sequence identities were similarly calculated in windows for the LS  
170 regions. Intriguingly, the LS regions displayed significantly increased sequence identities  
171 when compared with the core genome (Figure 2, Table 1), ranging from 92.3% median  
172 sequence identity for *V. zaregamsianum*, which is one of the phylogenetically most distantly  
173 related species to *V. dahliae*, to 100% median sequence identity for *V. alfalfae* and *V.*  
174 *nonalfalfae*. Thus, based on the genus-wide occurrence and a differential degree of sequence  
175 identity that reflects the phylogenetic distance to *V. dahliae*, we conclude that LS regions

176 display increased sequence conservation when compared with the core genome, rather than  
177 originate from horizontal transfer events.

178 In order to evaluate whether the increased sequence conservation is specific only to  
179 LS regions, we aligned *Verticillium* sequences of high identity to the complete *V. dahliae* JR2  
180 genome. For several species we used multiple strains at this stage. While some of these  
181 strains were previously sequenced (Supplemental\_Table\_S2) (Seidl et al. 2015; Jelen et al.  
182 2016; Shi-Kunne et al. in preparation) others were newly sequenced (*V. albo-atrum* strain  
183 PD670, *V. klebahnii* strain PD659 and *V. zaregamsianum* strain PD736) using the Illumina  
184 HiSeq2000 platform. Nearly all (99-100%) of the *V. alfalfae* and *V. nonalfalfae* sequences  
185 that display >96% identity to *V. dahliae* strain JR2 sequenced localized in LS regions (Figure  
186 3). Similarly, sequences of at least 100 kb with >90% identity of other *Verticillium* spp.  
187 mapped to *V. dahliae* JR2 LS regions, ranging from 70% in *V. nubilum* PD621 tot 95% in *V.*  
188 *albo-atrum* PD670 and *V. tricorpus* PD593 (Figure 3, Supplemental\_Table\_S3). In  
189 conclusion, increased sequence conservation is a genomic feature that is specifically  
190 associated with LS regions in *V. dahliae*.

191 **Table 1: Sequence identities between *V. dahliae* (JR2) and other haploid *Verticillium* species (excluding repetitive regions).**

| Species/strain                 | Genome-wide <sup>a</sup><br>(%) | LS regions <sup>a</sup><br>(%) | # windows aligned to<br>LS regions <sup>b</sup> | <i>p</i> -value <sup>c</sup> |
|--------------------------------|---------------------------------|--------------------------------|-------------------------------------------------|------------------------------|
| <i>V. albo-atrum</i> /PD747    | 88.8 (0.12)                     | 97.6 (0.31)                    | 146                                             | 2.2e-16                      |
| <i>V. alfalfae</i> /PD683      | 94.6 (0.03)                     | 100.0 (0.16)                   | 465                                             | 2.2e-16                      |
| <i>V. nonalfalfae</i> /TAB2    | 94.8 (0.03)                     | 100.0 (0.09)                   | 1037                                            | 2.2e-16                      |
| <i>V. nubilum</i> /PD621       | 88.4 (0.09)                     | 95.6 (0.41)                    | 144                                             | 2.2e-16                      |
| <i>V. tricorpus</i> /PD593     | 89.0 (0.12)                     | 97.2 (0.32)                    | 162                                             | 2.2e-16                      |
| <i>V. isaacii</i> /PD660       | 88.8 (0.12)                     | 98.6 (0.32)                    | 189                                             | 2.2e-16                      |
| <i>V. klebahnii</i> /PD401     | 88.8 (0.11)                     | 97.8 (0.57)                    | 87                                              | 2.2e-16                      |
| <i>V. zaregamsianum</i> /PD739 | 88.8 (0.10)                     | 92.3 (0.69)                    | 38                                              | 1.56e-5                      |

192 <sup>a</sup>The percentage is the median sequence identity and the number between the brackets is the standard error.

193 <sup>b</sup>Windows of 500bp

194 <sup>c</sup>The *p*-value was calculated with a two-sided Wilcoxon rank-sum test

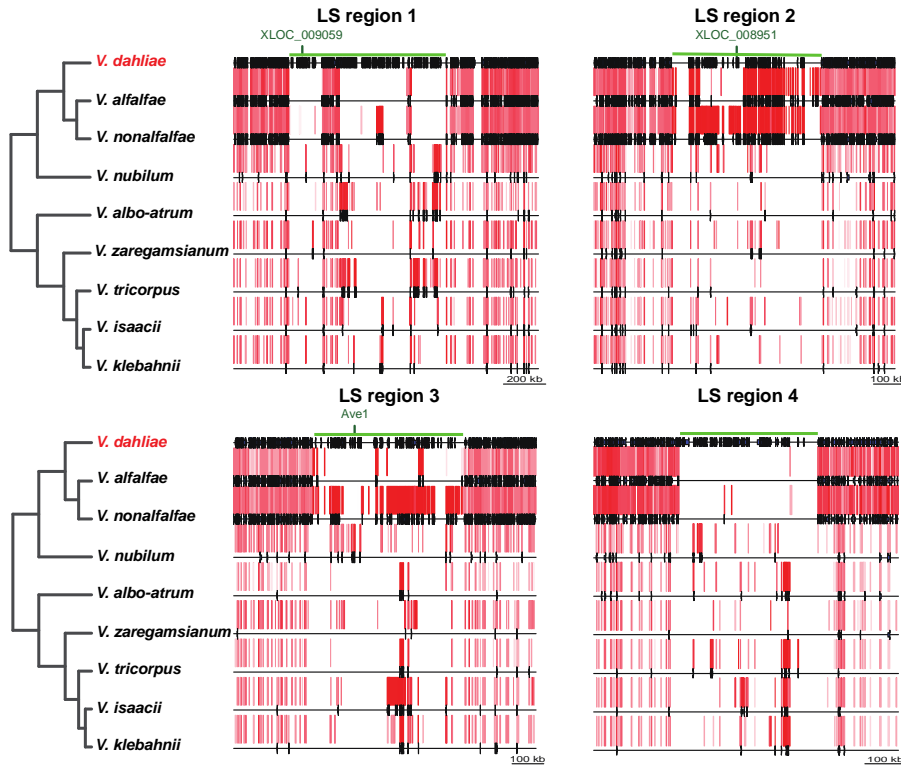

195

196 **Figure 2: Interspecific alignments and sequence identity within and immediately**  
197 **adjacent to lineage-specific (LS) regions of *V. dahliae*.** The green line indicates the extent  
198 of the LS region. The pink/red bars are *Verticillium* sequences alignments to JR2, whereas the  
199 intensity of their colour represents relative sequence identity for every *Verticillium* spp.  
200 individually (higher identity = red, lower identity = pink). The black, vertical stripes on the  
201 synteny lines represent predicted gene positions. For *V. dahliae* JR2, all predicted genes are  
202 depicted, whereas for other species only genes are depicted if these were successfully  
203 aligned. Locations of characterized *V. dahliae* effector genes are indicated: *Ave1*,  
204 *XLOC\_008951* and *XLOC\_009059* (de Jonge et al. 2012; de Jonge et al. 2013). Strains used  
205 in this figure: *V. dahliae* JR2, *V. alfalfae* PD683, *V. nonalfalfae* TAB2, *V. nubilum* PD621, *V.*  
206 *albo-atrum* PD747, *V. zaregamsianum* PD739, *V. tricorpus* PD593, *V. isaacii* PD660 and *V.*  
207 *klebahnii* PD401.

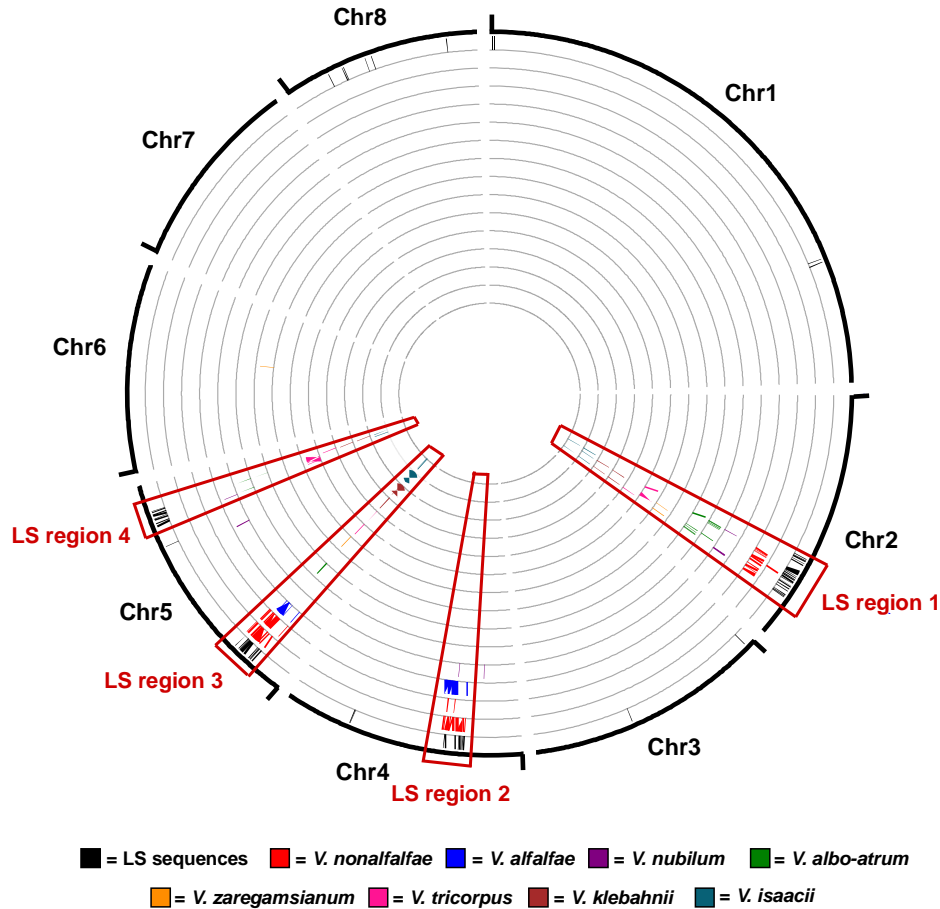

208

209 **Figure 3. Regions of particular high sequence identity between *V. dahliae* and other**

210 **haploid *Verticillium* species.** Black bars correspond to lineage-specific sequences of *V.*

211 *dahliae* strain JR2 (for details, see Figure 1). Sequences ( $\geq 7.5$  kb) with high sequence identity

212 in any of the other *Verticillium* spp. ( $\geq 96\%$  for *V. alfalfae* and *V. nonalfalfae*,  $\geq 90\%$  for all

213 other *Verticillium* spp.) are plotted at the corresponding position on the genome of *V. dahliae*

214 strain JR2. Plotting order for the different *Verticillium* strains from the outside to inside of the

215 circle: *V. dahliae* JR2 *V. nonalfalfae* TAB2 and Rec, *V. alfalfae* PD683, *V. nubilum* PD621,

216 *V. albo-atrum* PD670 and PD747, *V. zaregamsianum* PD736 and PD739, *V. tricorpus* PD593

217 and MUCL9792, *V. klebahnii* PD401 and PD659, *V. isaacii* PD618 and PD660.

218 **LS regions with increased sequence conservation are not unique to *V. dahliae***

219 To investigate whether other *Verticillium* spp. similarly carry LS regions that display  
220 increased sequence conservation, we performed alignments using *V. tricorpus* strain PD593  
221 as a reference because of its high degree of completeness, as seven of the nine scaffolds  
222 likely represent complete chromosomes (Supplemental\_Table\_S2) (Shi-Kunne et al. in  
223 preparation). Furthermore, this species belongs to the Flavexudans clade in contrast to *V.*  
224 *dahliae* that belongs to the Flavnonexudans clade. LS sequences of *V. tricorpus* strain PD593  
225 were determined by comparison to *V. tricorpus* strain MUCL9792 (Seidl et al. 2015). In total,  
226 98% of the PD593 genome could be aligned to MUCL9792. However, 48% of the sequences  
227 that are specific for *V. tricorpus* strain PD593 resided in one genomic region of 41 kb on  
228 scaffold 1 (Figure 4). Like for *V. dahliae* strain JR2, we were able to align sequences of other  
229 *Verticillium* spp. with high identity to the *V. tricorpus* strain PD593 genome (Figure 4): *V.*  
230 *isaacii*, *V. klebahnii* and *V. zaregamsianum* display a median genome identity of ~95% to *V.*  
231 *tricorpus*, while other haploid *Verticillium* spp. display ~88-89% median genome identity.  
232 Notably, regions that display significant higher sequence identity localized at the LS region  
233 on scaffold 1 region, but also to an additional region of 23 kb on scaffold 6 (Figure 4,  
234 Supplemental\_Figure\_S3). For *Verticillium* strains with total alignments of at least 100 kb of  
235 high-identity sequences, the fraction of high-identity sequences that aligned to the scaffold 1  
236 and 6 genome loci ranged from 49% for *V. nubilum* (PD621) up to 84% for *V. albo-atrum*  
237 (PD747) (Supplemental\_Table\_S4). As expected, the sequence identity to six of the eight  
238 other haploid *Verticillium* spp. was significantly higher in these two genome loci compared to  
239 the genome-wide median (Supplemental\_Table\_S5). No increase in sequence identity was  
240 found in alignments with *V. alfalfae* strain PD683 and *V. zaregamsianum* strain PD739 as  
241 only few regions with high sequence identity aligned to strain PD593  
242 (Supplemental\_Table\_S4). Strains PD683 and PD739 only aligned 2 and 37 windows of 500

243 bp, respectively, to scaffold 1 and 6 loci of PD593 (Supplemental\_Figure\_S3,  
244 Supplemental\_Table\_S5). In conclusion, LS regions with increased sequence conservation  
245 are not unique to *V. dahliae*, but also occur in *V. tricorpus*, and thus likely in other  
246 *Verticillium* spp. as well.

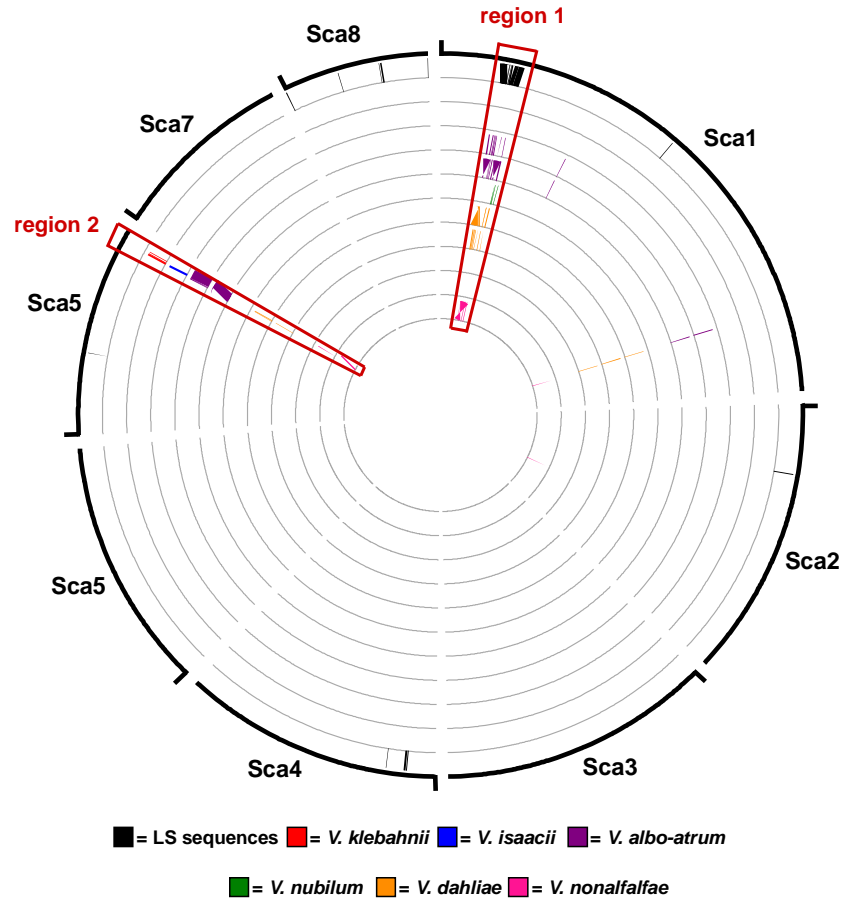

247  
248

**Figure 4. Regions of particular high sequence identity between *V. tricornutum* and other**

249 **haploid *Verticillium* species.** The eight biggest scaffolds of PD593 are depicted as these  
250 comprise over 99.5% of the genome. Black bars correspond to LS sequences ( $\geq 7.5$  kb) in the  
251 PD593 genome without alignments to *V. tricornutum* strain MUCL9792. Sequences ( $\geq 7.5$  kb)  
252 with relatively high sequence identity in any of the other *Verticillium* spp. ( $\geq 96\%$  *V. isaacii*,  
253 *V. klebahnii* and *V. zaregamsianum*,  $\geq 90\%$  for all other *Verticillium* spp.) are plotted at the  
254 corresponding position on the genome of *V. tricornutum* strain PD593. Plotting order for the  
255 different *Verticillium* strains from the outside to inside of the circle: *V. tricornutum* PD593, *V.*  
256 *klebahnii* PD659, *V. isaacii* PD660, *V. albo-atrum* PD670 and PD747, *V. nubilum* PD621, *V.*  
257 *dahliae* JR2, VdLs17 and 85S, *V. nonalfalae* TAB2 and Rec. Non-depicted *Verticillium*  
258 strains did not have sequences ( $\geq 7.5$  kb) with previously mention identity to PD593.



259 **The pan-LS-genome distribution across the *Verticillium* genus.**

260 The increased conservation of LS sequences in two diverged *Verticillium* species indicates  
261 that the origin of many of the LS regions is ancestral and predates their speciation. Hence, we  
262 constructed a pan-LS-genome to determine the distribution of conserved sequences across the  
263 *Verticillium* genus. To compose a pan-LS-genome, we combined regions with increased  
264 sequence conservation of four *Verticillium* spp., namely *V. dahliae* strain JR2, *V. alfalfae*  
265 strain PD683, *V. tricorpus* strain PD593 and *V. klebahnii* strain PD401, motivated by their  
266 high assembly contiguity and distribution throughout the *Verticillium* genus (Inderbitzin et al.  
267 2011a; Shi-Kunne et al. in preparation). After removal of repetitive and duplicated sequences,  
268 we obtained a pan-LS-genome of ~2 Mb, of which 60% occurs in genomes of clade  
269 Flavexudans and 72% in clade Flavnonexudans (clade pan-LS-genomes) (Figure 5). Next, the  
270 distribution of the pan-LS-genome and the clade pan-LS-genomes was evaluated for all  
271 *Verticillium* strains individually (Figure 5, Supplemental\_Table\_S6). The proportion of the  
272 LS-pan-genome differed markedly between *Verticillium* strains and ranged from 12% for *V.*  
273 *nubilum* strain PD621 up to 58% for *V. dahliae* strain JR2 (Figure 5). Notably, by using a  
274 limited number of isolates in the consensus reconstruction, retentions are likely biased  
275 towards strains that are phylogenetically closer related to the species that were used to  
276 compose the pan-genome: *V. alfalfa*, *V. dahliae*, *V. klebahnii* and *V. nonalfalfae*. However, *V.*  
277 *albo-atrum* strains contained considerably more of the pan-LS-genome compared to *V.*  
278 *zaregamsianum* and *V. isaacii* strains, despite its phylogenetically more distant relation to *V.*  
279 *klebahnii* and *V. tricorpus* (Figure 5). Moreover, LS contents do not only differ considerably  
280 between species but also within species as we also observed large intra-specific differences.  
281 For example, the genome of *V. dahliae* strain VdLs17 contains less than two thirds of the  
282 content present in the LS regions of the strain JR2 genome despite the recent divergence of  
283 the two strains (Figure 5, Supplemental\_Figure\_S1) (Faino et al. 2015). Thus, sequences with

284 increased conservation are genus-wide associated with dynamic genomic regions of  
285 *Verticillium* spp. as their contents vary greatly between and within species.

286

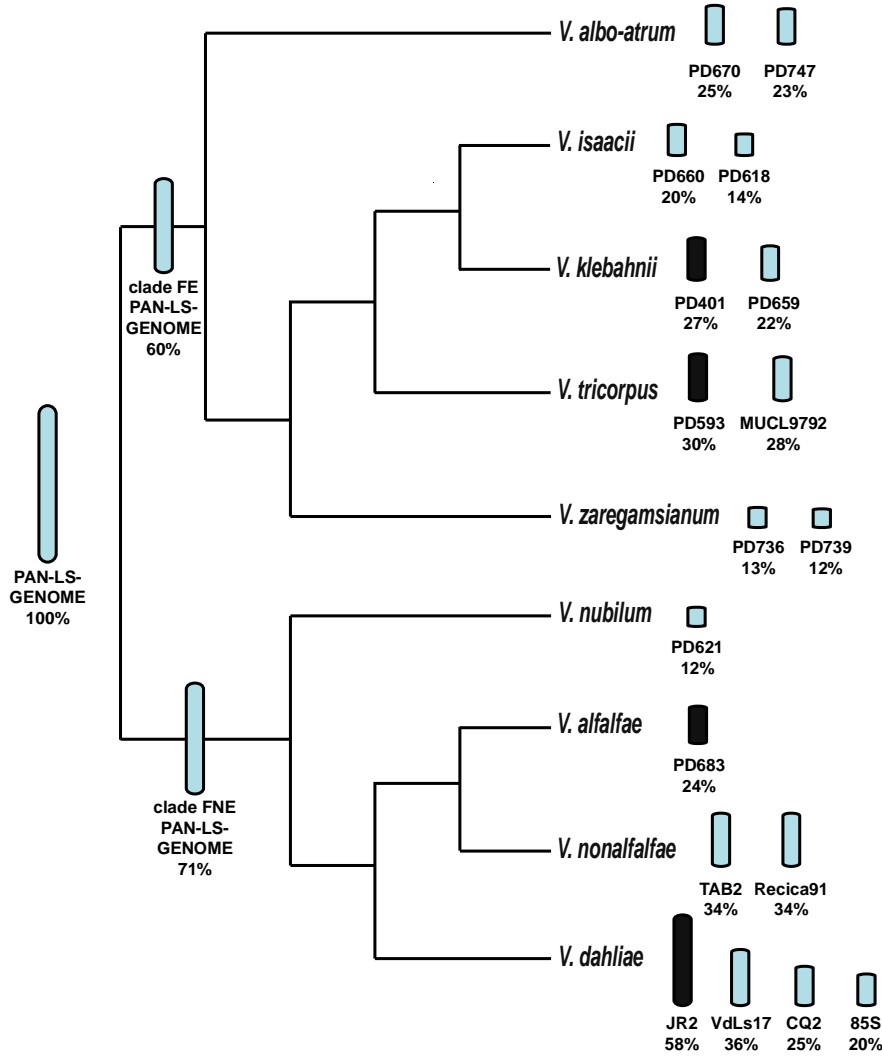

287

288 **Figure 5: Diversity of pan-LS-genome contents across the *Verticillium* genus.** A pan-LS-  
289 genome was constructed based on sequences from *Verticillium* isolates JR2, PD683, PD593  
290 and PD401 (black bars). The bar size next to the species names in the *Verticillium*  
291 phylogenetic tree is representative for the amount of the pan-LS-genome that is present in the  
292 individual isolates. All isolates of the clade Flavexudans (FE in figure) in this study were  
293 used to calculate the percentage of the pan-LS-genome that is present in clade Flavexudans.  
294 Similarly, the portion of the Flavnonexudans (FNE in figure) in the pan-LS-genome was  
295 calculated with all isolates of the clade Flavnonexudans used in this study.

## 296 **Increased sequence conservation is not driven by negative selection**

297 The depletion of sequence polymorphisms in LS regions may be driven by negative selection  
298 on genes with particular functions that happen to reside in these regions. Hence, we screened  
299 LS regions in the genome of *V. dahliae* strain JR2 for enrichment of particular protein  
300 domains (Pfam). In total, 13 Pfam domains with various functions are enriched in the LS  
301 region genes (Supplemental\_Table\_S7). However, if the negative selection on particular LS  
302 genes is responsible for observed increased sequence conservation, depletion of  
303 polymorphisms should only concern protein-coding sequences. To test this hypothesis, we  
304 compared the sequence identity of coding and intergenic regions between *V. dahliae* and *V.*  
305 *nonalfalfae*, which revealed that increased sequence conservation is also observed in  
306 intergenic regions (Figure 6), indicating that increased sequence conservation is likely not  
307 driven by negative selection acting on protein-coding genes.

308 To see how selection impacts the evolution of LS region genes, we determined the  
309 rates of non-synonymous ( $Ka$ ) and synonymous ( $Ks$ ) substitutions for genes that reside in LS  
310 regions versus those that reside in the core genome. In total, 49% (70 out of 142) of the LS  
311 genes could not be used for  $Ka$  and  $Ks$  determination, as we did not observe any substitutions  
312 when compared to their corresponding *V. nonalfalfae* orthologs. In contrast, within the core  
313 almost all genes (8,583 out of 8,584) display nucleotide substitutions with their respective *V.*  
314 *nonalfalfae* orthologs. The  $Ka$  was not different (two-sided Wilcoxon rank-sum test,  $P < 0.05$ )  
315 between LS (median=0.015,  $n=74$ ) and core (median=0.015,  $n=8583$ ) genes (Figure 7). In  
316 contrast, the  $Ks$  of LS genes (median=0.12,  $n=74$ ) was significantly lower than of core genes  
317 (median=0.16,  $n=8583$ ). Consequently, LS genes (median=0.38,  $n=60$ ) have significantly  
318 higher  $Ka/Ks$  values than core genes (median=0.09,  $n=8289$ ), calculated for genes that have  
319 both synonymous and non-synonymous substitutions compared with their *V. nonalfalfae*  
320 orthologs. In total, 15 of the 74 tested genes displayed  $Ka/Ks > 1$ , which is a higher proportion

321 than the 100 of the 8,583 core genes with  $Ka/Ks>1$  (Fisher's exact test,  $P<0.05$ ). Two LS and  
322 two core genes with  $Ka/Ks>1$  were predicted to contain an N-terminal signal peptide, which  
323 is a typical characteristic of an effector protein. However, due to the limited sequence  
324 divergence in the LS regions, positive selection on the genes with  $Ka/Ks>1$  was not  
325 significant based on a Z-test, whereas in the core genome 21 genes were found to be under  
326 positive selection ( $P<0.05$ ). In conclusion, despite increased sequence conservation, genes in  
327 LS regions display symptoms of more diversifying selection than the core genome as  $Ka/Ks$   
328 ratios were significantly higher for LS region genes.

329

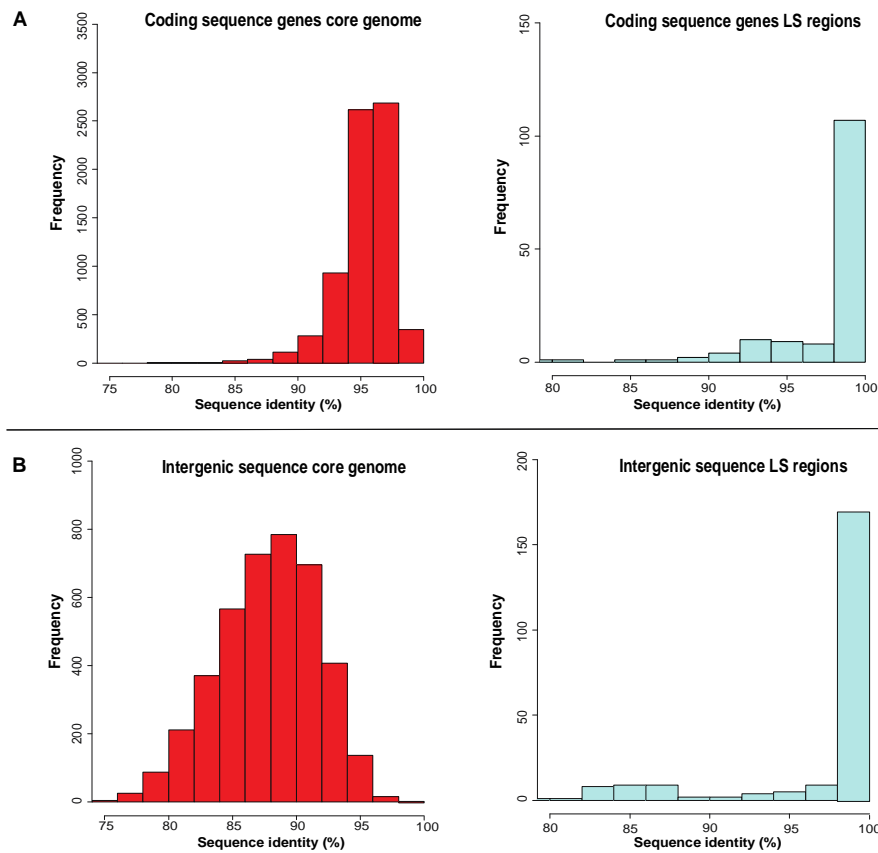

330

331 **Figure 6: Sequence identity of *V. dahliae* JR2 core and lineage-specific (LS) regions with**  
332 ***V. nonalfalfae* (TAB2) for coding and intergenic sequences. (A) Coding sequence of JR2**  
333 **genes were aligned to coding sequences of TAB2 genes. Matching coding sequences of genes**  
334 **that minimally covered 80% of each other were selected and sequence identity between their**  
335 **homologs was determined. (B) For the intergenic regions, windows of 5 kb were constructed**  
336 **for JR2 core and LS regions. The sequence identity distribution is significantly different**  
337 **between core and LS regions and this for both the coding sequence of genes and intergenic**  
338 **regions (two-sided Wilcoxon rank-sum test,  $p < 0.0001$ ).**

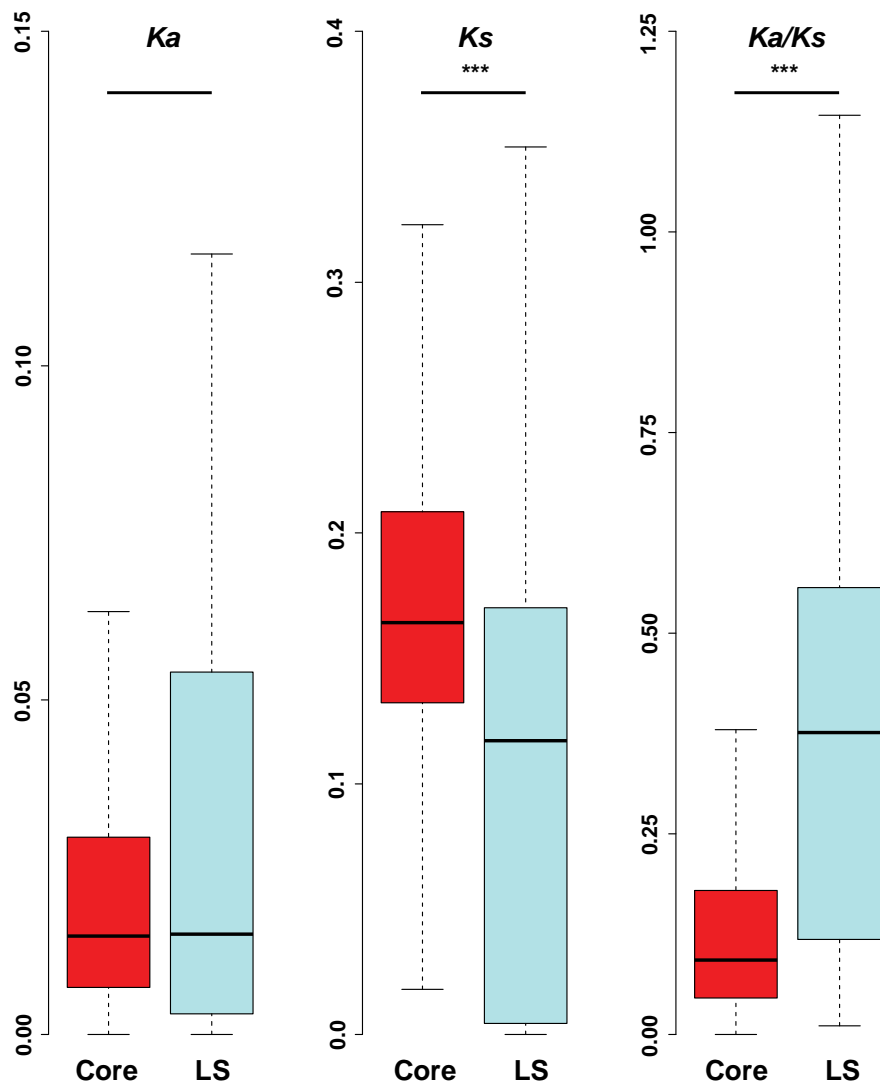

339

340 **Figure 7: Comparison of substitutions of *V. dahliae* (JR2) and *V. nonalfalae* (TAB2)**

341 **orthologs between core and lineage-specific (LS) regions.** The distribution of non-

342 synonymous substitution rates ( $Ka$ ), synonymous substitution rates ( $Ks$ ) and  $Ka/Ks$  ratios are

343 depicted for *V. dahliae* genes aligned to *V. nonalfalae* orthologs. Outliers are not depicted.

344 Significant differences between core and LS genes are indicated by \*\*\* (two-sided Wilcoxon

345 rank-sum test,  $p < 0.05$ ).

346

## 347 **DISCUSSION**

348 Genomes of many filamentous plant pathogens are thought to obey to the two-speed  
349 evolution model (Croll and McDonald 2012; Dong et al. 2015; Möller and Stukenbrock  
350 2017). Similarly, *V. dahliae* has been suggested to evolve under a two-speed regime, as LS  
351 regions display signs of accelerated evolution as they are hot-spots for structural variation  
352 and TE activity (de Jonge et al. 2013; Faino et al. 2015; Faino et al. 2016). Additionally, we  
353 establish here that LS regions display abundant presence/absence polymorphisms between  
354 closely and even distantly related *V. dahliae* strains (Figure 1, Supplemental\_Figure\_S1) (de  
355 Jonge et al. 2013; Faino et al. 2016). Intriguingly, however, genomic sequences that are  
356 present within LS regions display increased sequence conservation when compared with  
357 other *Verticillium* spp. (Figure 2,3,S2; Table 1). Generally, sequences with increased  
358 identities between distinct taxa can originate from horizontal transfer, a phenomenon that has  
359 been implicated in the pathogenicity of various filamentous plant pathogens (Soanes and  
360 Richards 2014). For instance, *Pyrenophora tritici-repentis*, the causal agent of wheat tan spot,  
361 acquired a gene from the fungal wheat pathogen *Phaeosphaeria nodorum* enabling the  
362 production of the host-specific toxin ToxA that mediates pathogenicity on wheat (Friesen et  
363 al. 2006). However, the increased sequence identity of LS sequences in *V. dahliae* is likely  
364 not a consequence of horizontal transfer as homologous sequences are found in all  
365 *Verticillium* spp., and the degree of sequence conservation with these *Verticillium* spp.  
366 corresponds to their phylogenetic distance to *V. dahliae* (Table 1). Intriguingly, the increased  
367 sequence conservation is not a consequence of negative selection on coding regions, as  
368 intergenic regions display similarly increased levels of sequence conservation (Figure 6). In  
369 addition, genes residing in LS regions display higher  $Ka/Ks$  ratios compared to core genes,  
370 indicating the higher diversifying selection acting on these genes (Figure 7) (Sperschneider et  
371 al. 2015). In conclusion, the increased sequence conservation is likely caused by lower



372 mutation rates in LS regions, as horizontal DNA transfer and negative selection are unlikely  
373 explanations.

374 Lower levels of synonymous substitutions were similarly found in the repeat-rich  
375 dispensable chromosomes of the fungal wheat pathogen *Zymoseptoria tritici* (Stukenbrock et  
376 al. 2010). However, this observation was not attributed to lower mutation rates, but rather the  
377 consequence of a lower effective population size of these dispensable chromosomes  
378 (Stukenbrock et al. 2010). Increased sequence conservation caused by lower substitution rates  
379 as observed in our study is an unprecedented for repeat-rich regions of filamentous  
380 pathogens. In contrast, previously increased substitution rates have often been associated with  
381 the two-speed genome evolution (Cuomo et al. 2007; Dong et al. 2015). For example, repeat-  
382 induced point (RIP) mutagenesis increases sequence divergence of particular effector genes  
383 of the oilseed rape pathogen *Leptosphaeria maculans* that are localized adjacent to TEs (van  
384 de Wouw et al. 2010). However, accelerated evolution through SNPs is not consistently  
385 observed for all two-speed genomes, as no significant difference in SNP frequencies between  
386 core and repeat-rich genomic regions was found for *P. infestans* (Raffaele et al. 2010).

387 Increased sequence conservation of LS regions seems counter-intuitive in the light of  
388 the two-speed genome model as increased variation of pathogenicity-related genes facilitates  
389 rapid evasion of host immunity. Nonetheless, an effector gene subjected to increased  
390 sequence conservation stood the test of time. The *Ave1* effector gene resides in an LS region  
391 of *V. dahliae* strain JR2 and is highly conserved as an identical copy was found in *V. alfalfae*  
392 strain VaMs102, a strain with an average nucleotide identity of 92% (de Jonge et al. 2012).  
393 Moreover, no *Ave1* allelic variation is hitherto found in the *V. dahliae* population as well as in  
394 *V. alfalfae* and *V. nonalfalfae* (de Jonge et al. 2012; Song et al. unpublished data).  
395 Conceivably, sequence conservation makes an effector gene an easy target for recognition by  
396 the host and also *Ave1* is a target for immunity recognition by tomato receptor Ve1 (Fradin et

397 al. 2009). Thus, effector catalogue diversification must be achieved through different means.  
398 Indeed, instead through SNPs, *V. dahliae* alters its effector repertoires through  
399 presence/absence polymorphisms (de Jonge et al. 2013), leading to large diversities in LS  
400 region contents between strains (Figure 5, Supplemental\_Table\_S6). Hence, the evasion of  
401 Ve1-mediated recognition in tomato is exclusively observed through the absence of the *Ave1*  
402 gene in *V. dahliae* strains (de Jonge et al. 2012).

403         Mechanisms that can explain the observed lower SNP frequency rates locally, in  
404 repeat-rich genomic regions, remain unknown. SNPs often originate from the wrong  
405 nucleotide insertion by DNA polymerase and there is no immediate reason why this should  
406 be different in LS regions. Possibly, the depletion of SNPs can be associated with a  
407 differential epigenetic organisation of LS regions, as repeat-rich regions in other filamentous  
408 pathogens are associated with densely organised chromatin, referred to as heterochromatin  
409 (Galazka and Freitag 2014). For instance, the repeat-rich conditionally dispensable  
410 chromosomes of *Z. tritici* are enriched for histone modifications associated with  
411 heterochromatin, in contrast to core chromosomes that were largely euchromatic, i.e.  
412 transcriptionally active (Schotanus et al. 2015). The link between chromatin and structural  
413 variation is under debate and controversial (Seidl et al. 2016). In general, heterochromatin is  
414 thought to suppress genomic structural alterations as recombination is repressed in  
415 heterochromatic regions of many eukaryotic genomes. However, heterochromatic regions in  
416 the filamentous pathogens *Z. tritici* are enriched for structural variations as they are enriched  
417 for duplications and deletions (Seidl et al. 2016). *V. dahliae* LS regions display similar  
418 features with enrichment of repeats, segmental duplications and presence/absence  
419 polymorphisms, hence LS regions can be anticipated to be heterochromatic (Figure 1) (de  
420 Jonge et al. 2013; Faino et al. 2016). Further research is needed to investigate whether

421 differences in chromatin organisation may affect SNP frequencies in filamentous pathogens  
422 in general, and may explain lower rates of SNP frequencies in *V. dahliae* LS regions.

423

#### 424 **Conclusion**

425 The two-speed genome is an intuitive evolutionary model for filamentous pathogens, as  
426 genes important for pathogenicity benefit from frequent alternations to guarantee the  
427 continuation of symbiosis with the host. However, filamentous pathogens comprise a  
428 heterogeneous group of organisms with diverse lifestyles (Dean et al. 2012; Kamoun et al.  
429 2015). Consequently, it is not surprising that accelerated evolution is driven by different  
430 mechanisms between species. Moreover, not all filamentous pathogens appear to adhere to  
431 the two-speed genome model (Derbyshire et al. 2017). In *V. dahliae*, acceleration evolution is  
432 merely achieved through presence/absence polymorphisms, as nucleotide sequences are  
433 highly conserved in LS regions. The dependency of host adaptation on presence/absence  
434 polymorphisms may lead to a more rapid immunity evasion than sequence alterations through  
435 SNPs (Daverdin et al. 2012). Thus, the quick fashion of host immunity evasion through the  
436 deletion of effector genes can be evolutionary advantageous over allelic diversification,  
437 especially for pathogens with a small effective population size.

438

## 439 METHODS

### 440 Genome sequencing and assembly of *Verticillium* isolates

441 In total, we used 18 *Verticillium* genomes in this study (Supplemental\_Table\_S2). Genomes  
442 of *V. albo-atrum* PD747, *V. alfalfae* PD683, *V. dahliae* JR2 and VdLs17, *V. isaacii* PD618,  
443 *V. klebahnii* PD401, *V. nubilum* PD621, *V. tricorpus* PD593 and MUCL9792, *V.*  
444 *zaregamsianum* PD739 were previously sequenced and assembled (Klosterman et al. 2011;  
445 Faino et al. 2015; Seidl et al. 2015; Shi-Kunne et al. in preparation). Furthermore, sequence  
446 reads of the two *V. nonalfalfae* isolates (TAB2 and Rec) were publically available (Bioproject  
447 PRJNA283258) (Jelen et al. 2016). *Verticillium* strains CQ2, 85S, PD670, PD660, PD659  
448 and PD736 were sequenced in this study. To this end, we isolated genomic DNA from  
449 conidia and mycelium fragments that were harvested from cultures that were grown in liquid  
450 potato dextrose agar according to the protocol described by Seidl *et al.* (2015). We sequenced  
451 *V. dahliae* strains CQ2 and 85S by single molecule real time (SMRT) sequencing. The  
452 PacBio libraries for sequencing on the PacBio RSII platform (Pacific Biosciences of  
453 California, CA, USA) were constructed as described previously by Faino et al. (2015).  
454 Briefly, DNA was mechanically sheared and size selected using the BluePippin preparation  
455 system (Sage Science, Beverly, MA, USA) to produce ~20 kb size libraries. The sheared  
456 DNA and final library were characterized for size distribution using an Agilent Bioanalyzer  
457 2100 (Agilent Technology, Inc., Santa Clara, CA, USA). The PacBio libraries were  
458 sequenced on four SMRT cells per *V. dahliae* isolate using the PacBio RS II instrument at the  
459 Beijing Genome Institute (BGI, Hong Kong) for CQ2 and at KeyGene N.V. (Wageningen,  
460 the Netherlands) for 85S, respectively. Sequencing was performed using the P6-C4  
461 polymerase-Chemistry combination and a >4 h movie time and stage start. Filtered sub-reads  
462 for CQ2 and 85S, were assembled using the HGAP v3 protocol (Supplemental\_Table\_S1)  
463 (Chin et al. 2013).

464 For PD670, PD660, PD659 and PD736, two libraries (500 bp and 5 Kb insert size)  
465 were prepared and sequenced using the Illumina High-throughput sequencing platform  
466 (KeyGene N.V., Wageningen, The Netherlands). In total, ~18 million paired-end reads (150  
467 bp read length; 500 bp insert size library) and ~16 million mate-paired read (150 bp read  
468 length; 5 kb insert size library) were produced per strain. We assembled the genomes using  
469 the A5 pipeline (Tritt et al. 2012), and we subsequently filled the remaining sequence gaps  
470 using SOAPdenovo2 (Luo et al. 2012). After obtaining the final assemblies, we used QUAST  
471 (Gurevich et al. 2013) to calculate genome statistics. Gene annotation for *V. dahliae* strain  
472 JR2 and other *Verticillium* spp. were obtained from Faino et al. (2015) and Shi-Kunne et al.  
473 (in preparation). Genes for *V. isaacii* strain PD660 were annotated with the Maker2 pipeline  
474 according to Shi-Kunne et al. (in preparation) (Holt and Yandell 2011).

475

#### 476 **Comparative genome analysis**

477 The alignments of *Verticillium* sequences to a reference genome were performed with  
478 nucmer, which is part of the mummer package (v3.1) (Kurtz et al. 2004). Here, we used a  
479 repeat-masked genome as a reference in order to prevent assigning high sequence identities to  
480 repetitive elements. Repetitive elements were identified using RepeatModeler (v1.0.8) based  
481 on known repetitive elements and on *de novo* repeat identification, and genomes were  
482 subsequently masked using RepeatMasker (v4.0.6; sensitive mode) (Smit et al. 2015).

483 Linear plots showing alignments within and closely adjacent JR2 LS regions were  
484 plotted with the R package genoPlotR (Guy et al. 2011) (Figure 2, Supplemental\_Figure\_S3).  
485 The *Verticillium* phylogenetic tree adjacent to the genoPlotR plots was previously generated  
486 using 5,228 single-copy orthologs that are conserved among all of the genomes (Shi-Kunne et  
487 al. in preparation). The phylogenetic tree of *V. dahliae* strains was constructed using  
488 REALPHY (Bertels et al. 2014) (Supplemental\_Figure\_S1).

489 Alignments > 7.5 kb in length were depicted along the reference genome with the R  
490 package Rcircos (Figure 3,4) (Zhang et al. 2013). LS sequences were defined by alignment of  
491 different strains to a reference using nucmer (v3.1) (Kurtz et al. 2004) and regions were  
492 determined using BEDTools v2.25.0 (Quinlan and Hall 2010).

493 Lineage-specific regions of *V. dahliae* and *V. tricorpus* were arbitrarily delimited  
494 based on the abundance of LS sequences and increased sequence conservation  
495 (Supplemental\_Table\_S8). The pairwise identity of the genome-wide and LS regions  
496 between *V. dahliae/V. tricorpus* and other haploid *Verticillium* spp. was calculated using  
497 nucmer (mum), with dividing the respective query sequences into non-overlapping windows  
498 of 500 bp (Table 1). Sequence identities of the coding regions of genes and intergenic regions  
499 were retrieved by BLAST (v2.2.31+) searches between strains *V. dahliae* JR2 and *V.*  
500 *nonalfalae* TAB2 (Figure 6) (Altschul et al. 1990). Hits with a minimal coverage of 80%  
501 with each other were selected. Intergenic regions of JR2 were fractioned in 5 kb windows  
502 with BEDTools v2.25.0 and similarly blasted to the genome of TAB2 (Figure 6) (Quinlan  
503 and Hall 2010). Hits with a maximal bit-score and minimal alignment of 500 bp to a window  
504 were selected. To compare the rate of synonymous and non-synonymous substitutions  
505 between the core and LS regions,  $K_a$  and  $K_s$  were of orthologs of JR2 and TAB2 were  
506 determined using the Nei and Gojobori method (Nei and Gojoborit 1986) in PAML (v4.8)  
507 (Yang 2007). Significance of positive selection was tested using a Z-test (Stukenbrock and  
508 Dutheil 2012). Z-values >1.65 were considered significant with  $P<0.05$ . Secreted proteins  
509 were predicted by SignalP4 (Petersen et al. 2011).

510 Pfam function domains of JR2 proteomes were predicted using InterProScan (Jones et  
511 al. 2014). Subsequently, Pfam enrichment of genes residing in LS regions was carried out  
512 using hypergeometric tests, and significance values were corrected using the Benjamini-  
513 Hochberg false discovery method (Benjamini and Hochberg 1995).

514           The pan-LS-genome was constructed based on following *Verticillium* isolates: JR2  
515 (*V. dahliae*), PD683 (*V. alfalfae*), PD593 (*V. tricorpus*) and PD401 (*V. klebahnii*). Genome  
516 regions of these for species with increased sequence conservation were combined  
517 (Supplemental\_Table\_S8). Repeat masked regions were removed from the pan-LS-genome  
518 using BEDTools v2.25.0 (Quinlan and Hall 2010). Additionally, regions in duplicate ( $\geq 90\%$   
519 identity,  $\geq 100\text{bp}$ ) in the pan-LS-genome were determined using nucmer (v3.1) (Kurtz et al.  
520 2004) and subsequently removed with using BEDTools v2.25.0 (Quinlan and Hall 2010). As  
521 result, a pan-LS-genome was constructed without regions in duplicate. The fractions of pan-  
522 LS-genome that were present in every individual *Verticillium* strain was determined using  
523 nucmer (v3.1) (Kurtz et al. 2004). The clade pan-LS-genomes were constructed by  
524 combining all the pan-LS-genome regions that are present in the *Verticillium* clade isolates,  
525 which was then also removed from duplicate regions.

526 **ACKNOWLEDGEMENTS**

527 The authors would like to thank the Marie Curie Actions program of the European  
528 Commission that financially supports the research of J.R.L.D. Work in the laboratories of  
529 B.P.H.J.T. and M.F.S is supported by the Research Council Earth and Life Sciences (ALW)  
530 of the Netherlands Organization of Scientific Research (NWO). H. M. was supported by  
531 French Ministry of Higher Education and Research: CIFRE 2013/1431.

532

533 **DATA ACCESS**

534 The Whole Genome Shotgun projects have been deposited at DDBJ/ENA/GenBank as  
535 accessions PRLI00000000 and PRLJ00000000 for *V. dahliae* strains CQ2 and 85S,  
536 respectively.

537

538 **DISCLOSURE DECLARATION**

539 The authors report no conflicts of interest.



540 **REFERENCES**

- 541 Altschul SF, Gish W, Miller W, Myers EW, Lipman DJ. 1990. Basic local alignment search  
542 tool. *J. Mol. Biol.* 215:403–410.
- 543 Benjamini Y, Hochberg Y. 1995. Controlling the false discovery rate: a practical and  
544 powerful approach to multiple testing. *J. R. Stat. Soc. B* 57:289–300.
- 545 Bertels F, Silander OK, Pachkov M, Rainey PB, van Nimwegen E. 2014. Automated  
546 reconstruction of whole-genome phylogenies from short-sequence reads. *Mol. Biol.*  
547 *Evol.* 31:1077–1088.
- 548 Chin C-S, Alexander DH, Marks P, Klammer AA, Drake J, Heiner C, Clum A, Copeland A,  
549 Huddleston J, Eichler EE, et al. 2013. Nonhybrid, finished microbial genome assemblies  
550 from long-read SMRT sequencing data. *Nat. Methods* 10:563–569.
- 551 Cook DE, Mesarich CH, Thomma BPHJ. 2015. Understanding plant immunity as a  
552 surveillance system to detect invasion. *Annu. Rev. Phytopathol.* 53:541–563.
- 553 Croll D, McDonald BA. 2012. The accessory genome as a cradle for adaptive evolution in  
554 pathogens. *PLoS Pathog.* 8:e1002608.
- 555 Cuomo CA, Güldener U, Xu J-R, Trail F, Turgeon BG, Di Pietro A, Walton JD, Ma L-J,  
556 Baker SE, Rep M, et al. 2007. The *Fusarium graminearum* genome. *Science* 317:1400–  
557 1402.
- 558 Daverdin G, Rouxel T, Gout L, Aubertot J-N, Fudal I, Meyer M, Parlange F, Carpezat J,  
559 Balesdent M-H. 2012. Genome structure and reproductive behaviour influence the  
560 evolutionary potential of a fungal phytopathogen. *PLoS Pathog.* 8:e1003020.
- 561 Dean R, van Kan JAL, Pretorius ZA, Hammond-Kosack KE, Di Pietro A, Spanu PD, Rudd  
562 JJ, Dickman M, Kahmann R, Ellis J, et al. 2012. The top 10 fungal pathogens in  
563 molecular plant pathology. *Mol. Plant Pathol.* 13:414–430.
- 564 Depotter JRL, Seidl MF, van den Berg GCM, Thomma BPHJ, Wood TA. 2017. A distinct

- 565 and genetically diverse lineage of the hybrid fungal pathogen *Verticillium longisporum*  
566 population causes stem striping in British oilseed rape. *Environ. Microbiol.* 19:3997-  
567 4009.
- 568 Derbyshire M, Denton-Giles M, Hegedus D, Seifbarghi S, Rollins J, van Kan J, Seidl MF,  
569 Faino L, Mbengue M, Navaud O, et al. 2017. The complete genome sequence of the  
570 phytopathogenic fungus *Sclerotinia sclerotiorum* reveals insights into the genome  
571 architecture of broad host range pathogens. *Genome Biol. Evol.* 9:593–618.
- 572 Dong S, Raffaele S, Kamoun S. 2015. The two-speed genomes of filamentous pathogens:  
573 waltz with plants. *Curr. Opin. Genet. Dev.* 35:57–65.
- 574 Ebihara Y, Nagao H, Uematsu S, Moriwaki J, Kimishima E. 2003. First report of *Verticillium*  
575 *tricorpus* isolated from potato tubers in Japan. *Mycoscience* 44:481–488.
- 576 Faino L, Seidl M, Datema E, van den Berg GCM, Janssen A, Wittenberg AHJ, Thomma  
577 BPHJ. 2015. Single-molecule real-time sequencing combined with optical mapping  
578 yields completely finished fungal genome. *MBio* 6:e00936-15.
- 579 Faino L, Seidl MF, Shi-Kunne X, Pauper M, van den Berg GCM, Wittenberg AHJ, Thomma  
580 BPHJ. 2016. Transposons passively and actively contribute to evolution of the two-  
581 speed genome of a fungal pathogen. *Genome Res.* 26:1091-1100.
- 582 Fradin EF, Thomma BPHJ. 2006. Physiology and molecular aspects of *Verticillium* wilt  
583 diseases caused by *V. dahliae* and *V. albo-atrum*. *Mol. Plant Pathol.* 7:71–86.
- 584 Fradin EF, Zhang Z, Ayala JCJ, Castroverde CDM, Nazar RN, Robb J, Liu C-M, Thomma  
585 BPHJ. 2009. Genetic dissection of *Verticillium* wilt resistance mediated by tomato Ve1.  
586 *Plant Physiol.* 150:320–332.
- 587 Friesen TL, Stukenbrock EH, Liu Z, Meinhardt S, Ling H, Faris JD, Rasmussen JB, Solomon  
588 PS, McDonald BA, Oliver RP. 2006. Emergence of a new disease as a result of  
589 interspecific virulence gene transfer. *Nat. Genet.* 38:953–956.

- 590 Galazka JM, Freitag M. 2014. Variability of chromosome structure in pathogenic fungi - of “  
591 ends and odds .” *Curr. Opin. Microbiol.* 20:19–26.
- 592 Gurevich A, Saveliev V, Vyahhi N, Tesler G. 2013. QAST: quality assessment tool for  
593 genome assemblies. *Bioinformatics* 29:1072–1075.
- 594 Gurung S, Short DPG, Hu X, Sandoya GV, Hayes RJ, Koike ST, Subbarao KV. 2015. Host  
595 range of *Verticillium isaacii* and *Verticillium klebahnii* from artichoke, spinach and  
596 lettuce. *Plant Dis.* 99:933-938.
- 597 Guy L, Kultima JR, Andersson SGE. 2011. genoPlotR: comparative gene and genome  
598 visualization in R. *Bioinformatics* 26:2334–2335.
- 599 Haas BJ, Kamoun S, Zody MC, Jiang RHY, Handsaker RE, Cano LM, Grabherr M, Kodira  
600 CD, Raffaele S, Torto-Alalibo T, et al. 2009. Genome sequence and analysis of the Irish  
601 potato famine pathogen *Phytophthora infestans*. *Nature* 461:393–398.
- 602 Holt C, Yandell M. 2011. MAKER2: an annotation pipeline and genome- database  
603 management tool for second- generation genome projects. *BMC Bioinformatics* 12:491.
- 604 Inderbitzin P, Bostock RM, Davis RM, Usami T, Platt HW, Subbarao KV. 2011a.  
605 Phylogenetics and taxonomy of the fungal vascular wilt pathogen *Verticillium*, with the  
606 descriptions of five new species. *PLoS One* 6:e28341.
- 607 Inderbitzin P, Davis RM, Bostock RM, Subbarao KV. 2011b. The ascomycete *Verticillium*  
608 *longisporum* is a hybrid and a plant pathogen with an expanded host range. *PLoS One*  
609 6:e18260.
- 610 Inderbitzin P, Subbarao KV. 2014. *Verticillium* systematics and evolution: how confusion  
611 impedes *Verticillium* wilt management and how to resolve it. *Phytopathology* 104:564–  
612 574.
- 613 Jelen V, de Jonge R, Van de Peer Y, Javornik B, Jakše J. 2016. Complete mitochondrial  
614 genome of the *Verticillium*-wilt causing plant pathogen *Verticillium nonalfalfae*. *PLoS*

- 615 One 11:e0148525.
- 616 Jones JDG, Dangl JL. 2006. The plant immune system. *Nature* 444:323–329.
- 617 Jones P, Binns D, Chang H-Y, Fraser M, Li W, McAnulla C, McWilliam H, Maslen J,  
618 Mitchell A, Nuka G, et al. 2014. InterProScan 5: genome-scale protein function  
619 classification. *Bioinformatics* 30:1236–1240.
- 620 de Jonge R, Bolton MD, Kombrink A, van den Berg GCM, Yadeta KA, Thomma BPHJ.  
621 2013. Extensive chromosomal reshuffling drives evolution of virulence in an asexual  
622 pathogen. *Genome Res.* 23:1271–1282.
- 623 de Jonge R, Bolton MD, Thomma BPHJ. 2011. How filamentous pathogens co-opt plants:  
624 the ins and outs of fungal effectors. *Curr. Opin. Plant Biol.* 14:400–406.
- 625 de Jonge R, van Esse HP, Maruthachalam K, Bolton MD, Santhanam P. 2012. Tomato  
626 immune receptor Ve1 recognizes effector of multiple fungal pathogens uncovered by  
627 genome and RNA sequencing. *Proc. Natl. Acad. Sci.* 109:5110–5115.
- 628 Kamoun S, Furzer O, Jones JDG, Judelson HS, Ali GS, Dalio RJD, Roy SG, Schena L,  
629 Zambounis A, Panabieres F, et al. 2015. The top 10 oomycete pathogens in molecular  
630 plant pathology. *Mol. Plant Pathol.* 16:413–434.
- 631 Klosterman SJ, Subbarao KV, Kang S, Veronese P, Gold SE, Thomma BPHJ, Chen Z,  
632 Henrissat B, Lee Y-H, Park J, et al. 2011. Comparative genomics yields insights into  
633 niche adaptation of plant vascular wilt pathogens. *PLoS Pathog.* 7:e1002137.
- 634 Kurtz S, Phillippy A, Delcher AL, Smoot M, Shumway M, Antonescu C, Salzberg SL. 2004.  
635 Versatile and open software for comparing large genomes. *Genome Biol.* 5:R12.
- 636 Luo R, Liu B, Xie Y, Li Z, Huang W, Yuan J, He G, Chen Y, Pan Q, Liu Y, et al. 2012.  
637 SOAPdenovo2: an empirically improved memory-efficient short-read *de novo*  
638 assembler. *Gigascience* 1:18.
- 639 Magadum S, Banerjee U, Murugan P, Gangapur D, Ravikesavan R. 2013. Gene duplication

- 640 as a major force in evolution. *J. Genet.* 92:155–161.
- 641 Milgroom MG, Jiménez-Gasco MdM, Olivares-García C, Drott MT, Jiménez-Díaz RM.  
642 2014. Recombination between clonal lineages of the asexual fungus *Verticillium dahliae*  
643 detected by genotyping by sequencing. *PLoS One* 9:e106740.
- 644 Möller M, Stukenbrock EH. 2017. Evolution and genome architecture in fungal plant  
645 pathogens. *Nat. Rev. Microbiol.* 15:756-771.
- 646 Nei M, Gojoborit T. 1986. Simple methods for estimating the numbers of synonymous and  
647 nonsynonymous nucleotide substitutions. *Mol. Biol. Evol.* 3:418–426.
- 648 Petersen TN, Brunak S, von Heijne G, Nielsen H. 2011. SignalP 4.0: Discriminating signal  
649 peptides from transmembrane regions. *Nat. Methods* 8:785–786.
- 650 Quinlan AR, Hall IM. 2010. BEDTools: a flexible suite of utilities for comparing genomic  
651 features. *Bioinformatics* 26:841–842.
- 652 Raffaele S, Farrer RA, Cano LM, Studholme DJ, MacLean D, Thines M, Jiang RHY, Zody  
653 MC, Kunjeti SG, Donofrio NM, et al. 2010. Genome evolution following host jumps in  
654 the Irish potato famine pathogen lineage. *Science* 330:1540–1543.
- 655 Raffaele S, Kamoun S. 2012. Genome evolution in filamentous plant pathogens: why bigger  
656 can be better. *Nat. Rev. Microbiol.* 10:417–430.
- 657 Rovenich H, Boshoven JC, Thomma BPHJ. 2014. Filamentous pathogen effector functions:  
658 of pathogens, hosts and microbiomes. *Curr. Opin. Plant Biol.* 20:96–103.
- 659 Schotanus K, Soyer JL, Connolly LR, Grandaubert J, Happel P, Smith KM, Freitag M,  
660 Stukenbrock EH. 2015. Histone modifications rather than the novel regional  
661 centromeres of *Zymoseptoria tritici* distinguish core and accessory chromosomes.  
662 *Epigenetics Chromatin* 8:41.
- 663 Seidl MF, Cook DE, Thomma BPHJ. 2016. Chromatin biology impacts adaptive evolution of  
664 filamentous plant pathogens. *PLOS Pathog.* 12:e1005920.

- 665 Seidl MF, Faino L, Shi-kunne X, van den Berg GCM, Bolton MD, Thomma BPHJ. 2015.  
666 The genome of the saprophytic fungus *Verticillium tricorpus* reveals a complex effector  
667 repertoire resembling that of its pathogenic relatives. *MPMI* 28:362–373.
- 668 Seidl MF, Thomma BPHJ. 2014. Sex or no sex: Evolutionary adaptation occurs regardless.  
669 *BioEssays* 36:335–345.
- 670 Seidl MF, Thomma BPHJ. 2017. Transposable elements direct the coevolution between  
671 plants and microbes. *Trends Genet.* 33:842-851.
- 672 Shi-Kunne X, Faino L, van den Berg GCM, Thomma BPHJ, Seidl MF. Evolution within the  
673 fungal genus *Verticillium* is characterized by chromosomal rearrangements and gene  
674 losses. *Environ. Microbiol.* In preparation.
- 675 Short DPG, Gurung S, Hu X, Inderbitzin P, Subbarao KV. 2014. Maintenance of sex-related  
676 genes and the co-occurrence of both mating types in *Verticillium dahliae*. *PLoS One*  
677 9:e112145.
- 678 Smit AFA, Hubley R, Green P. 2015. RepeatMasker Open-4.0. Available from:  
679 <http://www.repeatmasker.org>
- 680 Soanes D, Richards TA. 2014. Horizontal gene transfer in eukaryotic plant pathogens. *Annu.*  
681 *Rev. Phytopathol.* 52:583–614.
- 682 Song Y, Zhang Z, Boshoven JC, Rovenich H, Seidl MF, Jakse J, Maruthachalam K, Liu C-  
683 M, Subbarao KV, Javornik B et al., unpublished data,  
684 <https://www.biorxiv.org/content/early/2017/01/26/103473>
- 685 Sperschneider J, Gardiner DM, Thatcher LF, Lyons R, Singh KB, Manners JM, Taylor JM.  
686 2015. Genome-wide analysis in three *Fusarium* pathogens identifies rapidly evolving  
687 chromosomes and genes associated with pathogenicity. *Genome Biol. Evol.* 7:1613–  
688 1627.
- 689 Stukenbrock EH, Dutheil JY. 2012. Comparing fungal genomes: insight into functional and

- 690 evolutionary processes. *Methods Mol. Biol.* 835:531–548.
- 691 Stukenbrock EH, Jørgensen FG, Zala M, Hansen TT, McDonald BA, Schierup MH. 2010.
- 692 Whole-genome and chromosome evolution associated with host adaptation and
- 693 speciation of the wheat pathogen *Mycosphaerella graminicola*. *PLoS Genet.*
- 694 6:e1001189.
- 695 Thomma BPHJ, Nürnberger T, Joosten MHAJ. 2011. Of PAMPs and effectors: the blurred
- 696 PTI-ETI dichotomy. *Plant Cell* 23:4–15.
- 697 Tritt A, Eisen JA, Facciotti MT, Darling AE. 2012. An integrated pipeline for de novo
- 698 assembly of microbial genomes. *PLoS One* 7:e42304.
- 699 van de Wouw AP, Cozijnsen AJ, Hane JK, Brunner PC, McDonald BA, Oliver RP, Howlett
- 700 BJ. 2010. Evolution of linked avirulence effectors in *Leptosphaeria maculans* is affected
- 701 by genomic environment and exposure to resistance genes in host plants. *PLoS Pathog.*
- 702 6:e1001180.
- 703 Yang Z. 2007. PAML 4: Phylogenetic analysis by maximum likelihood. *Mol. Biol. Evol.*
- 704 24:1586–1591.
- 705 Zhang H, Meltzer P, Davis S. 2013. RCircos: an R package for Circos 2D track plots. *BMC*
- 706 *Bioinformatics* 14:244.
